# Supplementary material
Source: Springer Nature journal article supplement (https://www.springermedizin.de/resource/supplementary/12885_2004_155_MOESM11_ESM.pdf/9469030)

Z92K 21 22 26 A11 B6  
 U M U M U M U M \* U M U M

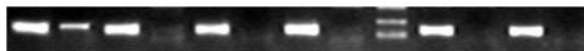

2,

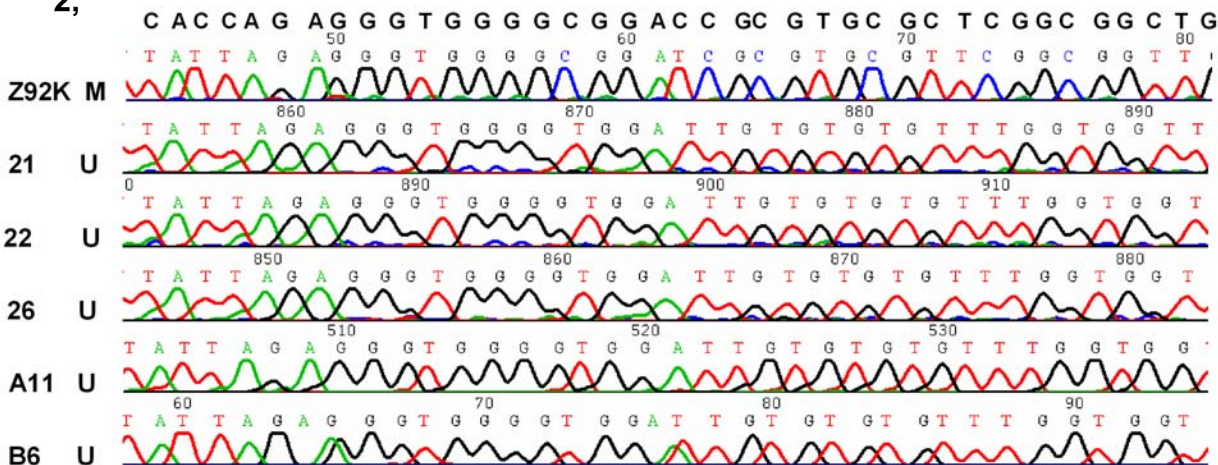

Supplement: MOESM11 [file 9469030]
